# Supplementary material for: Altitudinal Variation on Metabolites, Elements, and Antioxidant Activities of Medicinal Plant Asarum
Source: MDPI journal article supplement (doi:10.3390/metabo13121193), 2023-12-09
Supplement: s1 [file s1]

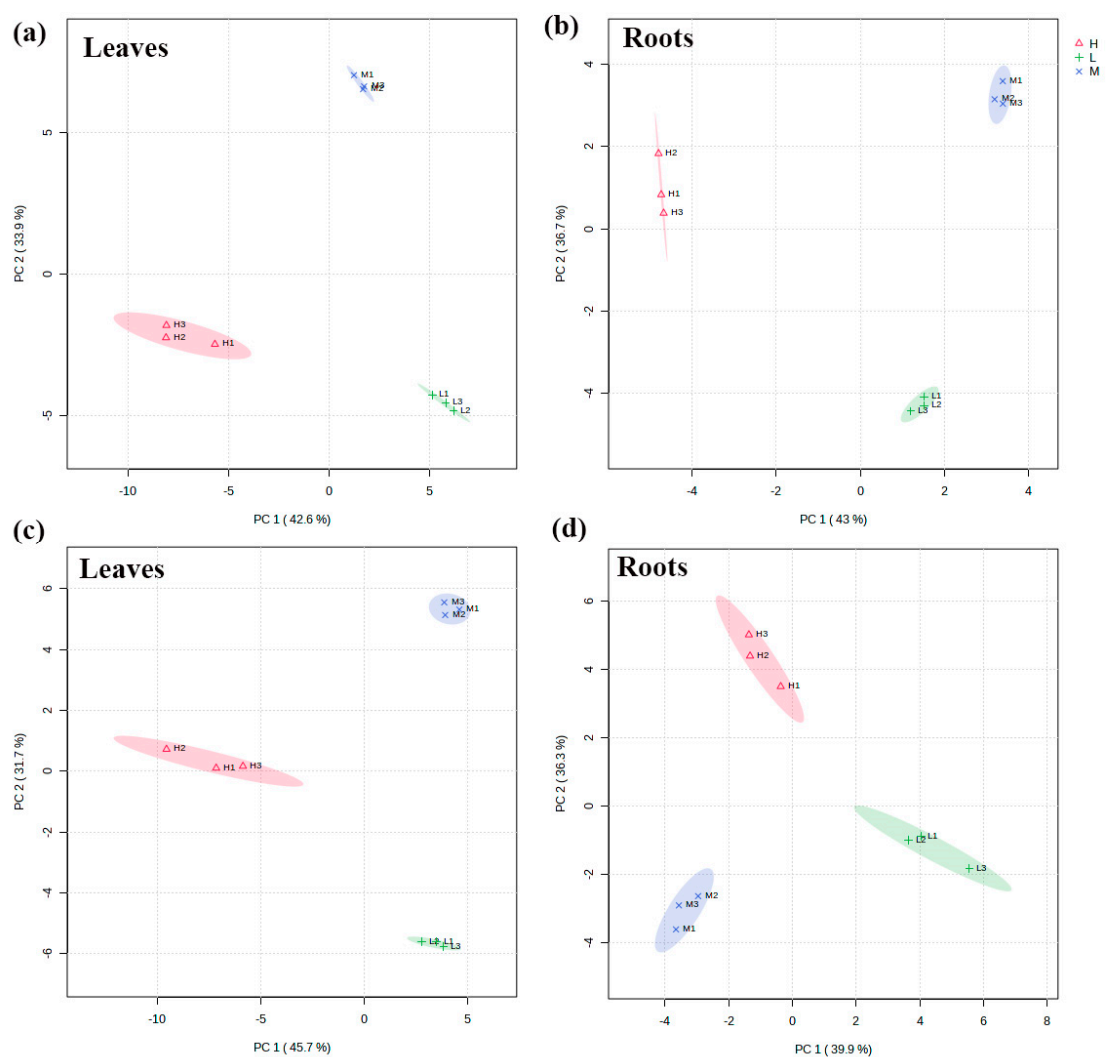

**Figure S1** Multivariate analysis of primary metabolites (a, c) and phenolic metabolites (b, d) at different altitudes for leaves and roots.

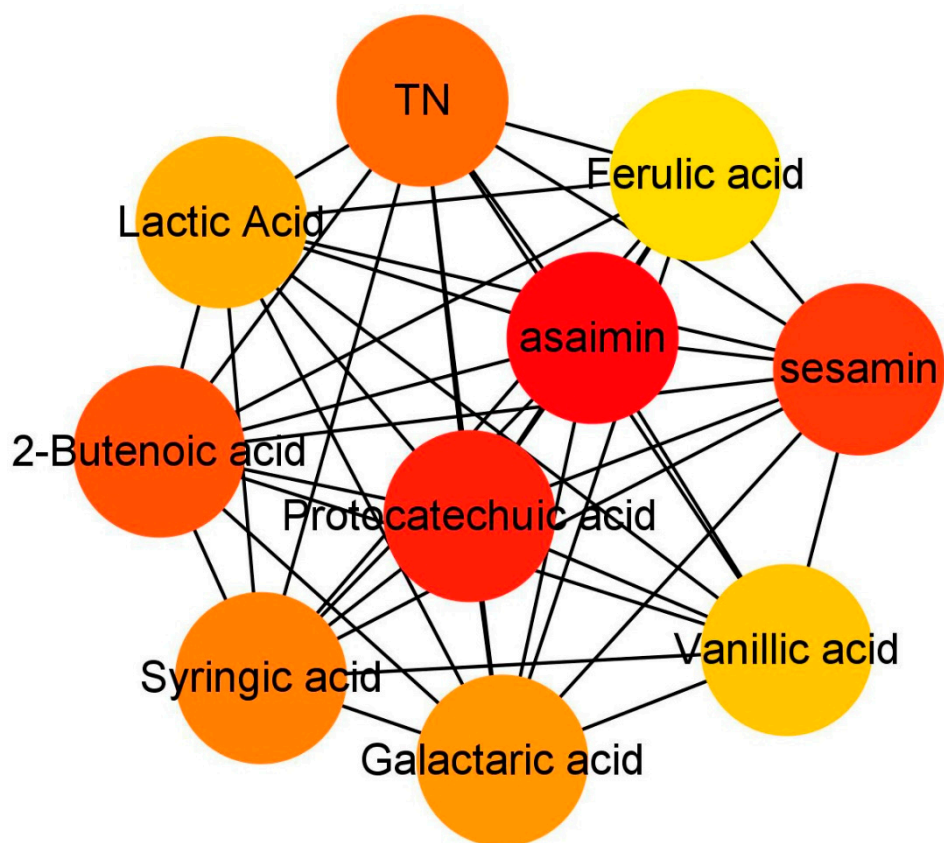

**Figure S2** Top 10 nodes in *Asarum* ranked by MCC.
