# Supplementary material for: Altitudinal Variation on Metabolites, Elements, and Antioxidant Activities of Medicinal Plant Asarum
Source: Metabolites. 2023 Dec 9;13(12):1193. doi: 10.3390/metabo13121193 (PMC10745449; doi:10.3390/metabo13121193)
Supplement: Supplementary file 1 [file metabolites-13-01193-s001.zip › Supplementary Material B.xlsx]

## Sheet: Table S1
Table S1. Variance contribution of each element
Element	Leaves		Roots
	PC1	PC2	PC1	PC2
TOC	0.270403	0.175118	0.331755	0.068571
TN	0.277766	-0.216036	-0.00930041	0.434887
TP	0.26204	-0.291491	-0.110201	0.415949
Mg	0.0133044	0.44493	-0.334795	-0.096674
Al	0.147167	0.417785	-0.324692	-0.12372
Fe	0.331524	-0.0933806	0.224999	0.268547
Mn	-0.314553	-0.053386	0.236481	-0.320614
Zn	0.320616	-0.0779468	-0.338015	-0.0642833
Cu	0.22872	0.343648	-0.304723	-0.162227
B	-0.335239	-0.00789314	0.337925	-0.069026
Mo	0.333602	-0.0628431	0.237902	-0.320171

## Sheet: Table S2
Table S2. Nutritiona element distribution in leaves and roots at different altitudes
	LOD (mg/L)	Leaves			Roots
		L	M	H	L	M	H
TOC(%)	-	55.36±19.29b	58.96±12.49a	60.56±17.32a	54.56±12.49c	57.96±6.00b	60.76±9.17a
TN(%)	-	2.6±0.45b	3.95±0.17a	3.07±0.09b	1.29±0.04b	1.76±0.11a	1.32±0.00b
TP(%)	-	0.06±0.01c	0.2±0.01a	0.09±0.01b	0.09±0.01b	0.17±0.01a	0.06±0.01c
Mg (mg/kg)	0.0001	1.23±0.17b	1.01±0.15b	1.7±0.03a	15.43±0.95a	6.8±0.17b	1.41±0.01c
Al(mg/kg)	0.0001	0.99±0.10c	1.73±0.16b	8.43±0.48a	13.23±1.05a	6.86±1.10b	3.78±0.11c
Fe (mg/kg)	0.0005	276.84±36.33c	899.46±34.83a	673.71±23.26b	454.19±52.26b	678.72±56.04a	648.71±104.06a
Mn (mg/kg)	0.0002	74.81±2.69a	45.84±5.51b	47.00±7.91b	54.29±3.03b	30.86±4.21c	94.47±3.34a
Zn (mg/kg)	0.0004	72.79±3.35b	105.19±8.14a	94.69±4.06a	137.88±4.63a	85.61±7.93b	43.08±2.84c
Cu (mg/kg)	0.001	71.9±4.71c	110.9±1.85b	176.24±5.31a	215.43±16.90a	168.21±6.90b	153.78±5.01b
B(mg/kg)	0.0014	6.73±0.14a	5.2±0.03c	5.44±0.06b	1.03±0.08c	2.36±0.17b	5.69±0.36a
Mo(mg/kg)	0.0001	0.24±0.00c	0.48±0.03a	0.41±0.00b	0.26±0.01b	1.17±0.01c	0.44±0.01a
Notes: Different lower-case letters indicate a significant difference (P< 0.05) as determined by one-way ANOVA. All data shown were the means ± SD. TOC, total organic carbon; TN, total nitrogen; TP, total phosphorus.

## Sheet: Table S3
Table S3. List of the metabolites identified in Asarum
Compounds	Class	Leaves																		Roots
		L1		L2		L3		M1		M2		M3		H1		H2		H3		L1		L2		L3		M1		M2		M3		H1		H2		H3
		Peak area	Area (%)	Peak area	Area (%)	Peak area	Area (%)	Peak area	Area (%)	Peak area	Area (%)	Peak area	Area (%)	Peak area	Area (%)	Peak area	Area (%)	Peak area	Area (%)	Peak area	Area (%)	Peak area	Area (%)	Peak area	Area (%)	Peak area	Area (%)	Peak area	Area (%)	Peak area	Area (%)	Peak area	Area (%)	Peak area	Area (%)	Peak area	Area (%)
1-Butanol	Lipids	552	4.74716e-06	604	7.04918e-06	510	5.33054e-06	1301	1.10861e-05	1256	1.51656e-05	1201	1.0833e-05	1992	1.39309e-05	2094	1.40695e-05	2194	2.01408e-05	2363	0.00021929	2193	0.000147783	2400	0.000176803	1196	1.49161e-05	1237	1.08035e-05	1103	2.35099e-05	2308	2.06542e-05	2541	2.04996e-05	2401	2.48657e-05
1-Propanol	Lipids	-	-	-	-	-	-	-	-	-	-	-	-	-	-	-	-	-	-	1710	0.000158691	1676	0.000112943	1722	0.000126856	5941	7.40942e-05	6023	5.26029e-05	5832	0.000124306	3509	3.1402e-05	3694	2.98014e-05	3421	3.54292e-05
2(3H)-Furanone	Amines	-	-	-	-	-	-	-	-	-	-	-	-	-	-	-	-	-	-	2914	0.000270424	3012	0.000202974	2876	0.000211869	798	9.9524e-06	812	7.09174e-06	784	1.67106e-05	357	3.19478e-06	334	2.69455e-06	349	3.61438e-06
2,3-Butanediol	Alkaloids	-	-	-	-	-	-	-	-	-	-	-	-	-	-	-	-	-	-	6983	0.000648034	7025	0.000473404	6856	0.000505067	6110	7.6202e-05	7008	6.12055e-05	6555	0.000139717	7403	6.62493e-05	35071	0.000282936	3217	3.33165e-05
2-Butenedioic acid	Organic acids	62576	0.000538149	23140	0.000270063	93175	0.000973868	211110	0.00179891	112387	0.00135702	124466	0.00112268	197687	0.00138251	291563	0.001959	391362	0.00359268	3374	0.000313113	3487	0.000234983	3201	0.000235811	1564	1.95057e-05	1599	1.39651e-05	1492	3.18013e-05	30265	0.000270841	32305	0.000260621	31938	0.000330763
2-Butenoic acid	Lipids	11028	9.484e-05	12991	0.000151616	10293	0.000107583	22818	0.000194437	23001	0.000277725	22312	0.000201253	1026651	0.00717982	1310932	0.0088081	1169419	0.0107352	455	4.22248e-05	514	3.46376e-05	403	2.96881e-05	112	1.39683e-06	105	9.17035e-07	102	2.17408e-06	204	1.82559e-06	207	1.66998e-06	214	2.21627e-06
2-Propenamide	Amines	-	-	-	-	-	-	-	-	-	-	-	-	-	-	-	-	-	-	114	1.05794e-05	127	8.55833e-06	102	7.51412e-06	629	7.84469e-06	723	6.31444e-06	610	1.30019e-05	254	2.27304e-06	1161	9.3664e-06	532	5.5096e-06
2-Propenoic acid	Lipids	29483	0.000253552	103353	0.00120622	8326	8.70236e-05	2647	2.25556e-05	2723	3.28789e-05	3018	2.72223e-05	5950	4.16109e-05	103602	0.000696097	9814	9.00919e-05	7894	0.000732577	1358	9.15135e-05	12885	0.00094921	648	8.08165e-06	6230	5.44107e-05	11939	0.000254474	1663	1.48821e-05	1572	1.26822e-05	1455	1.50686e-05
2-Quinolinecarboxylic acid	Organic acids	-	-	-	-	-	-	-	-	-	-	-	-	-	-	-	-	-	-	1532	0.000142172	1634	0.000110113	1422	0.000104756	3521	4.39128e-05	3204	2.79827e-05	3321	7.07856e-05	3008	2.69185e-05	2983	2.40654e-05	3122	3.23327e-05
3-Aminoisobutyric acid	Lipids	3102	2.6677e-05	3288	3.83737e-05	3341	3.49202e-05	6339	5.40158e-05	6104	7.37027e-05	6244	5.63207e-05	12144	8.49283e-05	11725	7.87798e-05	10992	0.000100906	-	-	-	-	-	-	-	-	-	-	-	-	-	-	-	-	-	-
3-Chloro-1,2-propanediol	Lipids	16170	0.000139061	17421	0.000203318	16333	0.000170713	22340	0.000190363	20556	0.000248203	21155	0.000190817	9964	6.96826e-05	13735	9.22849e-05	15436	0.000141702	10437	0.000968572	17816	0.00120059	12756	0.000939707	14638	0.00018256	21381	0.000186735	16685	0.000355633	15782	0.000141233	14762	0.000119093	11734	0.000121522
3-Hydroxybenzoic acid	Organic acids	501	4.30856e-06	613	7.15422e-06	557	5.82178e-06	1209	1.03021e-05	1141	1.3777e-05	1137	1.02557e-05	1998	1.39729e-05	2104	1.41367e-05	2375	2.18024e-05	-	-	-	-	-	-	-	-	-	-	-	-	-	-	-	-	-	-
4-Aminobutanoic acid	Amino acids	400122	0.00344102	391384	0.00456778	384277	0.00401647	911204	0.00776454	780660	0.00942608	808864	0.00729592	1006607	0.00703964	1530339	0.0102823	1311497	0.0120395	302143	0.0280394	132922	0.0089574	295998	0.0218055	38852	0.00048455	190251	0.00166159	67818	0.00144551	762594	0.00682444	1771177	0.014289	755244	0.00782161
5-Hydroxytryptophan	Amino acids	-	-	-	-	-	-	-	-	-	-	-	-	-	-	-	-	-	-	2128	0.000197482	2034	0.000137068	2306	0.000169878	4233	5.27926e-05	3543	3.09434e-05	5832	0.000124306	7492	6.70457e-05	7259	5.85622e-05	7632	7.904e-05
Acetamide	Amines	473	4.06776e-06	525	6.12719e-06	450	4.70341e-06	1501	1.27903e-05	1422	1.71699e-05	1493	1.34668e-05	855	5.97939e-06	1103	7.41101e-06	984	9.03306e-06	251	2.32932e-05	235	1.58363e-05	240	1.76803e-05	721	8.99208e-06	642	5.60701e-06	613	1.30658e-05	119	1.06493e-06	102	8.22888e-07	98	1.01493e-06
Acetic acid	Organic acids	13443	0.000115609	12557	0.000146551	13244	0.000138427	82350	0.00070172	12655	0.000152803	57762	0.000521011	20386	0.000142568	22830	0.000153394	21723	0.000199416	7834	0.000727009	15025	0.00101251	5339	0.000393313	1723	2.14887e-05	1648	1.43931e-05	1572	3.35065e-05	3512	3.14288e-05	3662	2.95433e-05	3450	3.57296e-05
Aconitic acid	Organic acids	1199333	0.0103142	665940	0.00777208	1099877	0.0114959	74282	0.000632971	69710	0.000841713	66555	0.000600324	48371	0.000338279	109823	0.000737896	141935	0.00130295	211657	0.0196421	254518	0.0171516	368429	0.0271414	66576	0.000830315	57953	0.000506142	32465	0.000691977	703376	0.00629449	949931	0.00766359	81781	0.000846957
Arabinofuranose	Sugars	99949	0.000859554	81051	0.000945933	7417	7.75227e-05	25504	0.000217324	52865	0.000638318	42365	0.000382131	13097	9.1593e-05	4947	3.32387e-05	8225	7.5505e-05	56320	0.00522659	11507	0.000775439	35582	0.00262125	37029	0.000461814	33691	0.000294246	6247	0.000133152	8834	7.90553e-05	3467	2.79701e-05	17138	0.000177488
Benzamide	Amines	241	2.07258e-06	406	4.73836e-06	246	2.5712e-06	816	6.95329e-06	834	1.00701e-05	484	4.36566e-06	1044	7.30115e-06	349	2.34492e-06	2078	1.90759e-05	2583	0.000239707	3001	0.000202233	2056	0.000151461	4467	5.5711e-05	5124	4.47513e-05	9864	0.000210247	2103	1.88197e-05	2241	1.80793e-05	1283	1.32873e-05
Benzenamine	Amines	-	-	-	-	-	-	-	-	-	-	-	-	-	-	-	-	-	-	866	8.03663e-05	668	4.50155e-05	736	5.42195e-05	372	4.63946e-06	320	2.79477e-06	354	7.54535e-06	1205	1.07835e-05	1221	9.85045e-06	1320	1.36704e-05
Butane	Others	1661	1.42845e-05	1705	1.98988e-05	1658	1.73295e-05	8068	6.8749e-05	8177	9.87331e-05	7681	6.92824e-05	1337	9.35022e-06	827	5.55658e-06	1959	1.79835e-05	-	-	-	-	-	-	-	-	-	-	-	-	-	-	-	-	-	-
Butanedioic acid	Organic acids	102517	0.000881638	42694	0.000498275	70952	0.000741592	180745	0.00154016	117409	0.00141765	105546	0.000952021	82268	0.000575336	81493	0.000547548	83379	0.000765414	22452	0.00208358	19295	0.00130026	24355	0.00179418	166593	0.00207769	19340	0.000168909	16100	0.000343164	38657	0.000345941	41472	0.000334576	40115	0.000415447
Butanoic acid	Organic acids	290	2.49398e-06	1086	1.26745e-05	882	9.21869e-06	2451	2.08854e-05	2067	2.4958e-05	1407	1.26911e-05	2289	1.6008e-05	4307	2.89385e-05	4614	4.23562e-05	2032	0.000188573	2564	0.000172784	2937	0.000216362	3554	4.43243e-05	1724	1.50568e-05	6763	0.00014415	2663	2.38311e-05	2553	2.05964e-05	2441	2.528e-05
Cadaverine	Amines	2593	2.22996e-05	1938	2.26181e-05	2230	2.3308e-05	3781	3.22186e-05	18068	0.000218162	11355	0.000102422	5478	3.831e-05	4471	3.00405e-05	44692	0.00041027	-	-	-	-	-	-	-	-	-	-	-	-	-	-	-	-	-	-
Carbamic acid	Organic acids	1974	1.69762e-05	1774	2.07041e-05	2047	2.13953e-05	2380	2.02804e-05	2421	2.92324e-05	2501	2.25589e-05	396	2.7694e-06	406	2.7279e-06	385	3.53428e-06	-	-	-	-	-	-	-	-	-	-	-	-	-	-	-	-	-	-
Citric acid	Organic acids	135742	0.00116737	129881	0.00151582	134107	0.00140169	2351741	0.0200396	3376419	0.0407686	1094865	0.00987564	581147	0.00406421	163533	0.00109877	1338298	0.0122855	459577	0.0426495	322567	0.0217373	685306	0.050485	4575845	0.0570685	2062760	0.0180155	821698	0.0175141	533124	0.00477091	1866625	0.015059	1334252	0.013818
Cysteine	Amino acids	-	-	-	-	-	-	-	-	-	-	-	-	-	-	-	-	-	-	5583	0.000518112	6134	0.000413361	5688	0.000419023	26473	0.000330163	28834	0.000251827	27324	0.000582399	13242	0.000118502	10233	8.2555e-05	11750	0.000121688
D-(+)-Cellobiose	Sugars	-	-	-	-	-	-	-	-	-	-	-	-	-	-	-	-	-	-	31884	0.00295889	30118	0.0020296	32984	0.00242986	66301	0.000826885	67948	0.000593435	68382	0.00145753	84332	0.000754685	82756	0.000667636	81002	0.000838889
D-(+)-Xylose	Sugars	65859	0.000566382	66012	0.000770415	65311	0.000682633	8843	7.53529e-05	7541	9.10538e-05	7826	7.05902e-05	15033	0.000105132	17192	0.000115512	16462	0.00015112	-	-	-	-	-	-	-	-	-	-	-	-	-	-	-	-	-	-
D-Arabinose	Sugars	123990	0.0010663	125191	0.00146108	124936	0.00130583	22865	0.000194837	23014	0.000277882	21047	0.000189843	6992	4.88981e-05	7332	4.92634e-05	6592	6.05142e-05	-	-	-	-	-	-	-	-	-	-	-	-	-	-	-	-	-	-
Decane	Others	4844	4.1658e-05	2530	2.95272e-05	2951	3.08439e-05	6041	5.14765e-05	4897	5.91288e-05	16732	0.000150922	11405	7.97601e-05	10951	7.35793e-05	11219	0.00010299	7859	0.000729329	13350	0.000899635	46644	0.00343616	6250	7.7948e-05	5178	4.52229e-05	5883	0.000125393	10104	9.04205e-05	1327	1.07056e-05	2780	2.87908e-05
D-Fructose	Sugars	103545599	0.890484	77995636	0.910274	93170313	0.973819	102569949	0.874018	75786274	0.915081	104578951	0.943298	125532639	0.877904	145307617	0.976316	108933185	1	7204056	0.668549	9296696	0.62649	8989479	0.662235	12777483	0.159357	13313630	0.116277	31083800	0.662537	79023964	0.707184	89366011	0.720963	58068338	0.601379
d-Galactose	Sugars	255866	0.00220043	252527	0.0029472	250112	0.00261418	8869	7.55744e-05	9012	0.000108815	8972	8.09271e-05	435828	0.00304793	443653	0.00298089	420615	0.00386122	266401	0.0247225	259675	0.0174991	255682	0.0188355	54265	0.000676776	58854	0.000514011	56275	0.00119948	166352	0.00148868	171242	0.0013815	169170	0.00175199
D-Gluconic acid	Organic acids	36308	0.000312246	36991	0.000431716	35621	0.000372312	72617	0.000618783	76658	0.000925607	80014	0.000721723	117012	0.000818316	121003	0.000813014	115442	0.00105975	921513	0.085518	916364	0.0617523	912526	0.0672238	755428	0.00942146	749624	0.00654697	797377	0.0169957	1392544	0.0124618	1701771	0.0137291	153726	0.00159205
d-Glucose	Sugars	116280099	1	85683670	1	95675191	1	117354501	1	82819197	1	110865175	1	142991263	1	148832627	1	30702047	0.281843	10775662	1	14839345	1	13574445	1	23914218	0.29825	23403425	0.204398	46916312	1	111744629	1	123953736	1	88575600	0.917324
Dihydroxyacetone	Sugars	11505	9.89421e-05	55161	0.000643775	105376	0.00110139	2123	1.80905e-05	1553	1.87517e-05	1982	1.78776e-05	4102	2.86871e-05	3577	2.40337e-05	3229	2.9642e-05	-	-	-	-	-	-	-	-	-	-	-	-	-	-	-	-	-	-
DL-Norvaline	Amino acids	757	6.51014e-06	690	8.05288e-06	693	7.24326e-06	1604	1.3668e-05	1498	1.80876e-05	1509	1.36111e-05	120492	0.000842653	119221	0.000801041	118731	0.00108994	-	-	-	-	-	-	-	-	-	-	-	-	-	-	-	-	-	-
D-Lyxose	Sugars	26635	0.000229059	28613	0.000333938	28875	0.000301802	1785	1.52103e-05	2044	2.46803e-05	1997	1.80129e-05	9094	6.35983e-05	9122	6.12903e-05	9044	8.30234e-05	-	-	-	-	-	-	-	-	-	-	-	-	-	-	-	-	-	-
d-Mannose	Sugars	298014	0.0025629	188069	0.00219492	245358	0.00256449	78892	0.000672254	113966	0.00137608	145465	0.00131209	19201	0.000134281	3162949	0.0212517	99137	0.000910072	880438	0.0817062	5079	0.000342266	990830	0.0729923	72518	0.000904421	1371588	0.011979	4347990	0.0926754	390512	0.00349468	1273902	0.0102772	454748	0.00470955
Dodecane	Lipids	22937	0.000197256	27566	0.000321718	36327	0.000379691	50885	0.000433601	10394	0.000125502	39351	0.000354945	45521	0.000318348	44870	0.00030148	52485	0.000481809	6764	0.000627711	6979	0.000470304	6843	0.000504109	35509	0.000442857	12565	0.000109739	70218	0.00149666	48945	0.000438008	50482	0.000407265	14702	0.00015226
Dopamine	Amines	2190	1.88338e-05	3021	3.52576e-05	2012	2.10295e-05	5164	4.40034e-05	4267	5.15219e-05	4887	4.40806e-05	6393	4.4709e-05	7762	5.21525e-05	21468	0.000197075	3050	0.000283045	8865	0.000597398	16174	0.0011915	21342	0.000266171	19354	0.000169031	20221	0.000431001	8196	7.33458e-05	3203	2.58403e-05	5354	5.54482e-05
D-Phenylalanine	Amino acids	-	-	-	-	-	-	-	-	-	-	-	-	-	-	-	-	-	-	2483	0.000230427	2541	0.000171234	2509	0.000184833	1294	1.61384e-05	1302	1.13712e-05	1288	2.74531e-05	3491	3.12409e-05	3394	2.73812e-05	3223	3.33787e-05
d-Ribose	Sugars	65254	0.000561179	65231	0.0007613	35210	0.000368016	159886	0.00136242	162042	0.00195658	162858	0.00146897	38617	0.000270065	256679	0.00172462	22986	0.00021101	-	-	-	-	-	-	-	-	-	-	-	-	-	-	-	-	-	-
D-Threitol	Polyols	37112	0.00031916	36896	0.000430607	36511	0.000381614	10039	8.55442e-05	9982	0.000120528	10125	9.13271e-05	19931	0.000139386	20142	0.000135333	18732	0.000171959	-	-	-	-	-	-	-	-	-	-	-	-	-	-	-	-	-	-
D-Xylose	Sugars	58684	0.000504678	59931	0.000699445	57122	0.000597041	124454	0.0010605	12557	0.000151619	12347	0.00011137	6173	4.31705e-05	6299	4.23227e-05	6183	5.67596e-05	-	-	-	-	-	-	-	-	-	-	-	-	-	-	-	-	-	-
Erythritol	Polyols	11003	9.4625e-05	12021	0.000140295	11136	0.000116394	5755	4.90394e-05	5584	6.7424e-05	5681	5.12424e-05	38112	0.000266534	38069	0.000255784	37988	0.000348728	-	-	-	-	-	-	-	-	-	-	-	-	-	-	-	-	-	-
Ethanolamine	Amines	10023	8.6197e-05	12494	0.000145815	12486	0.000130504	40802	0.000347682	35225	0.000425324	20201	0.000182212	49332	0.000345	51021	0.000342808	50162	0.000460484	30238	0.00280614	38846	0.00261777	43924	0.00323579	31142	0.000388393	35680	0.000311617	25767	0.000549212	104748	0.000937387	114156	0.000920957	124425	0.00128859
Ethylamine	Amines	-	-	-	-	-	-	-	-	-	-	-	-	-	-	-	-	-	-	352	3.26662e-05	328	2.21034e-05	317	2.33527e-05	892	1.11247e-05	1021	8.91707e-06	909	1.93749e-05	689	6.16584e-06	702	5.6634e-06	693	7.17698e-06
Fumaric acid	Organic acids	-	-	-	-	-	-	-	-	-	-	-	-	-	-	-	-	-	-	1185	0.00010997	1203	8.10683e-05	1283	9.45158e-05	26433	0.000329664	23710	0.000207075	21002	0.000447648	2708	2.42338e-05	2712	2.18791e-05	2733	2.8304e-05
Galactaric acid	Lipids	33904	0.000291572	33234	0.000387869	31684	0.000331162	66229	0.00056435	32924	0.000397541	52114	0.000470066	74245	0.000519228	173861	0.00116816	166573	0.00152913	15723	0.00145912	10042	0.000676715	7854	0.000578587	11425	0.000142489	9938	8.67952e-05	10867	0.000231625	15332	0.000137206	16636	0.000134211	17745	0.000183774
Galactinol	Polyols	12045	0.000103586	10935	0.000127621	11408	0.000119237	38754	0.00033023	43896	0.000530022	33289	0.000300266	21293	0.000148911	20647	0.000138726	21607	0.000198351	-	-	-	-	-	-	-	-	-	-	-	-	-	-	-	-	-	-
Galactopyranose	Sugars	-	-	-	-	-	-	-	-	-	-	-	-	-	-	-	-	-	-	1274	0.000118229	1172	7.89792e-05	1127	8.30237e-05	2434	3.03561e-05	2509	2.19128e-05	2554	5.44374e-05	349983	0.00313199	334826	0.00270122	319463	0.00330849
Glyceric acid	Lipids	2837005	0.024398	2109966	0.0246251	4273757	0.0446694	910249	0.0077564	317021	0.00382787	525834	0.004743	745124	0.00521098	1932745	0.012986	1353680	0.0124267	15134	0.00140446	29340	0.00197718	12999	0.000957608	206	2.56917e-06	35192	0.000307355	41402	0.000882465	84309	0.000754479	68668	0.000553981	72242	0.000748167
Glycerol	Polyols	20072	0.000172618	10129	0.000118214	391717	0.00409424	4577	3.90015e-05	335486	0.00405082	15927	0.000143661	177882	0.00124401	9037	6.07192e-05	135704	0.00124575	4784	0.000443963	1037506	0.0699159	66254	0.00488079	61201	0.000763279	4290	3.74674e-05	190810	0.00406703	613401	0.00548931	740696	0.00597558	472952	0.00489808
Glycine	Amino acids	8902	7.65565e-05	7457	8.70294e-05	7890	8.24665e-05	15581	0.000132769	16608	0.000200533	15992	0.000144247	16322	0.000114147	15572	0.000104628	17888	0.000164211	6498	0.000603026	6693	0.000451031	6574	0.000484292	12955	0.000161571	12651	0.00011049	12431	0.000264961	32107	0.000287325	33122	0.000267213	34882	0.000361252
Glycolic acid	Organic acids	6623	5.69573e-05	14380	0.000167827	11363	0.000118766	8372	7.13394e-05	8628	0.000104179	9268	8.3597e-05	6883	4.81358e-05	6982	4.69118e-05	7018	6.44248e-05	-	-	-	-	-	-	-	-	-	-	-	-	-	-	-	-	-	-
Hexadecane	Others	17565	0.000151058	18821	0.000219657	16623	0.000173744	8311	7.08196e-05	7882	9.51712e-05	6934	6.25444e-05	42399	0.000296515	46621	0.000313244	45743	0.000419918	-	-	-	-	-	-	-	-	-	-	-	-	-	-	-	-	-	-
Hexanoic acid	Organic acids	-	-	-	-	-	-	-	-	-	-	-	-	-	-	-	-	-	-	1130	0.000104866	1387	9.34677e-05	1572	0.000115806	788	9.82768e-06	784	6.8472e-06	759	1.61777e-05	2108	1.88644e-05	1875	1.51266e-05	1971	2.04125e-05
Isovaleric acid	Organic acids	2991	2.57224e-05	2718	3.17213e-05	3170	3.31329e-05	658	5.60694e-06	669	8.07784e-06	580	5.23158e-06	1552	1.08538e-05	1302	8.74808e-06	1424	1.30722e-05	-	-	-	-	-	-	-	-	-	-	-	-	-	-	-	-	-	-
Lactic Acid	Lipids	20141	0.000173211	18784	0.000219225	45273	0.000473195	7800	6.64653e-05	7302	8.8168e-05	7582	6.83894e-05	4769	3.33517e-05	8588	5.77024e-05	6450	5.92106e-05	37752	0.00350345	32104	0.00216344	47331	0.00348677	40815	0.000509032	235873	0.00206004	97484	0.00207783	423523	0.0037901	149890	0.00120924	57140	0.000591765
Lactose	Sugars	6103	5.24853e-05	6543	7.63623e-05	5873	6.13848e-05	20660	0.000176048	25839	0.000311993	23011	0.000207558	12207	8.53689e-05	86177	0.00057902	43346	0.000397914	21909	0.00203319	98877	0.00666316	65224	0.00480491	107622	0.00134223	190627	0.00166487	86205	0.00183742	460871	0.00412432	273419	0.00220581	224431	0.0023243
L-Isoleucine	Amino acids	943	8.10973e-06	976	1.13907e-05	1023	1.06924e-05	1983	1.68975e-05	2012	2.42939e-05	1885	1.70026e-05	12993	9.08657e-05	10944	7.35323e-05	11373	0.000104403	2465	0.000228756	2648	0.000178445	2594	0.000191094	5631	7.0228e-05	5768	5.03758e-05	5341	0.000113841	12677	0.000113446	30837	0.000248778	18829	0.000195001
L-Proline	Amino acids	168	1.44479e-06	153	1.78564e-06	149	1.55735e-06	336	2.86312e-06	422	5.09544e-06	506	4.5641e-06	5882	4.11354e-05	6334	4.25579e-05	6113	5.6117e-05	-	-	-	-	-	-	-	-	-	-	-	-	-	-	-	-	-	-
L-Rhamnose	Sugars	11505	9.89421e-05	32745	0.000382162	18852	0.000197042	2907	2.47711e-05	3023	3.65012e-05	3158	2.8485e-05	4204	2.94004e-05	10815	7.26655e-05	18227	0.000167323	26752	0.00248263	4740	0.000319421	3962	0.000291872	6442	8.03426e-05	6648	5.80614e-05	6330	0.000134921	311245	0.00278532	314167	0.00253455	317552	0.00328869
L-Serine	Amino acids	3478	2.99105e-05	3518	4.1058e-05	3665	3.83067e-05	6885	5.86684e-05	6767	8.17081e-05	6601	5.95408e-05	13102	9.1628e-05	12979	8.72053e-05	12887	0.000118302	-	-	-	-	-	-	-	-	-	-	-	-	-	-	-	-	-	-
L-Threonine	Amino acids	-	-	-	-	-	-	-	-	-	-	-	-	-	-	-	-	-	-	7843	0.000727844	7793	0.000525158	7630	0.000562086	15334	0.000191241	14148	0.000123564	13299	0.000283462	35645	0.000318986	54780	0.000441939	46773	0.0004844
L-Valine	Amino acids	1654	1.42243e-05	1487	1.73545e-05	1675	1.75072e-05	10716	9.13131e-05	12655	0.000152803	9822	8.85941e-05	3218	2.25049e-05	3941	2.64794e-05	8797	8.07559e-05	1558	0.000144585	310	2.08904e-05	3007	0.000221519	5542	6.9118e-05	10451	9.12756e-05	112	2.38723e-06	17765	0.000158979	25325	0.00020431	19935	0.000206455
Malic acid	Organic acids	1731974	0.0148948	695976	0.00812262	3558754	0.0371962	6416612	0.0546772	3684088	0.0444835	4660949	0.0420416	5963220	0.0417034	10110760	0.0679338	13658291	0.125382	241697	0.0224299	251383	0.0169403	287634	0.0211894	227410	0.00283618	1103486	0.00963748	962731	0.0205202	895880	0.00801721	1156826	0.00933272	1024245	0.0106075
Maltose	Sugars	59160	0.000508771	60112	0.000701557	58812	0.000614705	29406	0.000250574	30112	0.000363587	28773	0.000259531	82178	0.000574706	95942	0.00064463	118347	0.00108642	352376	0.0327011	90695	0.00611179	608754	0.0448456	31732	0.000395751	37000	0.000323146	34343	0.000732006	347403	0.0031089	1993223	0.0160804	1105218	0.0114461
Myo-Inositol	Polyols	805404	0.00692641	998832	0.0116572	1102427	0.0115226	1810966	0.0154316	1742349	0.021038	1883881	0.0169925	40270	0.000281626	398812	0.0026796	410023	0.00376399	352541	0.0327164	327609	0.0220771	370183	0.0272706	570745	0.00711815	396348	0.00346157	500262	0.0106629	1022425	0.00914966	1213026	0.00978612	853810	0.0088424
Octane	Lipids	4238	3.64465e-05	4264	4.97644e-05	8613	9.00233e-05	9709	8.27322e-05	6569	7.93174e-05	7301	6.58548e-05	6458	4.51636e-05	6292	4.22757e-05	6357	5.83569e-05	11775	0.00109274	11402	0.000768363	12902	0.000950462	6445	8.038e-05	6286	5.48998e-05	6648	0.000141699	7329	6.5587e-05	6336	5.11158e-05	6679	6.91704e-05
Oxalic acid	Organic acids	247894	0.00213187	476970	0.00556664	547760	0.0057252	7322	6.23922e-05	4458	5.38281e-05	8887	8.01604e-05	3589	2.50994e-05	11228	7.54404e-05	7763	7.12639e-05	208	1.93028e-05	284	1.91383e-05	210	1.54702e-05	410	5.11339e-06	425	3.71181e-06	482	1.02736e-05	6413	5.73898e-05	6592	5.31811e-05	6629	6.86526e-05
Palmitic Acid	Organic acids	155724	0.00133921	117538	0.00137177	204701	0.00213954	133951	0.00114142	126390	0.0015261	126287	0.0011391	235900	0.00164975	244412	0.00164219	286288	0.00262811	135224	0.012549	112524	0.00758281	99746	0.00734807	77516	0.000966755	133137	0.00116277	198044	0.00422122	234174	0.00209562	287919	0.00232279	116853	0.00121018
Penicillamine	Amines	-	-	-	-	-	-	-	-	-	-	-	-	-	-	-	-	-	-	5772	0.000535652	5442	0.000366728	5650	0.000416223	9212	0.000114889	9463	8.26467e-05	9685	0.000206431	45822	0.00041006	46228	0.000372946	44124	0.000456966
Pentanoic acid	Organic acids	242	2.08118e-06	334	3.89806e-06	235	2.45623e-06	1038	8.845e-06	1151	1.38977e-05	1444	1.30248e-05	405	2.83234e-06	1037	6.96756e-06	863	7.92229e-06	1193	0.000110712	1235	8.32247e-05	1263	9.30425e-05	2553	3.18402e-05	2411	2.10569e-05	2315	4.93432e-05	1191	1.06582e-05	1248	1.00683e-05	1098	1.13713e-05
Phenylpropanolamine	Amines	25574	0.000219934	23063	0.000269164	21177	0.000221343	3048	2.59726e-05	2447	2.95463e-05	2795	2.52108e-05	13352	9.33763e-05	16157	0.000108558	15911	0.000146062	-	-	-	-	-	-	-	-	-	-	-	-	-	-	-	-	-	-
Phthalic acid	Organic acids	141	1.21259e-06	129	1.50554e-06	143	1.49464e-06	278	2.36889e-06	301	3.63442e-06	265	2.39029e-06	805	5.62971e-06	2070	1.39082e-05	1132	1.03917e-05	407	3.77703e-05	419	2.82357e-05	421	3.10142e-05	1696	2.1152e-05	1283	1.12053e-05	881	1.87781e-05	1474	1.31908e-05	1288	1.0391e-05	1177	1.21895e-05
Pipecolic acid	Alkaloids	6355	5.46525e-05	6452	7.53002e-05	7445	7.78154e-05	68247	0.000581546	70425	0.000850346	67441	0.000608315	12993	9.08657e-05	13102	8.80318e-05	13045	0.000119752	18737	0.00173883	12693	0.000855361	33057	0.00243524	7433	9.2702e-05	7276	6.35462e-05	7129	0.000151951	3662	3.27712e-05	3523	2.84219e-05	3721	3.85362e-05
Propanedioic acid	Organic acids	105881	0.000910569	101670	0.00118657	126008	0.00131704	181282	0.00154474	134030	0.00161834	216624	0.00195394	69251	0.000484302	125148	0.000840864	77512	0.000711555	19580	0.00181706	16201	0.00109176	12462	0.000918049	15641	0.00019507	3658	3.19478e-05	2685	5.72296e-05	32605	0.000291781	36227	0.000292262	34201	0.000354199
Propanoic acid	Lipids	3205	2.75628e-05	624	7.2826e-06	6469	6.76142e-05	11359	9.67922e-05	11305	0.000136502	11076	9.99051e-05	2781	1.94487e-05	2191	1.47212e-05	3091	2.83752e-05	4854	0.00045046	5576	0.000375758	5125	0.000377548	2014	2.5118e-05	1986	1.73451e-05	1866	3.97729e-05	6619	5.92333e-05	4832	3.89823e-05	5227	5.41329e-05
Propylamine	Amines	1201	1.03285e-05	1194	1.3935e-05	1143	1.19467e-05	562	4.78891e-06	622	7.51034e-06	597	5.38492e-06	1613	1.12804e-05	1602	1.07638e-05	1634	1.5e-05	-	-	-	-	-	-	-	-	-	-	-	-	-	-	-	-	-	-
Propylene glycol	Polyols	40508	0.000348366	51839	0.000605004	85208	0.000890597	93038	0.000792794	81053	0.000978674	96563	0.000870995	37413	0.000261645	46371	0.000311565	40969	0.000376093	64420	0.00597829	58840	0.00396513	58861	0.00433616	89108	0.00111133	75774	0.000661785	75076	0.00160021	54734	0.000489813	56109	0.000452661	55421	0.000573962
Ribitol	Polyols	4073	3.50275e-05	4299	5.01729e-05	4102	4.28742e-05	8511	7.25238e-05	8418	0.000101643	8503	7.66968e-05	28011	0.000195893	28620	0.000192297	27922	0.000256322	176321	0.0163629	158731	0.0106966	162122	0.0119432	12764	0.000159189	12649	0.000110472	12834	0.000273551	25529	0.000228458	25633	0.000206795	25483	0.000263912
Ribonic acid	Others	13906	0.000119591	13654	0.000159354	14020	0.000146537	38823	0.000330818	43090	0.00052029	33103	0.000298588	44861	0.000313732	232115	0.00155957	27812	0.000255312	835542	0.0775397	812234	0.0547352	827103	0.0609309	65146	0.00081248	65883	0.0005754	64227	0.00136897	130293	0.00116599	142871	0.00115262	135063	0.00139877
Sedoheptulose	Sugars	12050	0.000103629	187426	0.00218742	8746	9.14135e-05	83755	0.000713692	83731	0.00101101	83475	0.000752942	1528	1.0686e-05	7885	5.2979e-05	13460	0.000123562	4349	0.000403595	4536	0.000305674	4213	0.000310363	2184	2.72381e-05	2257	1.97119e-05	2178	4.64231e-05	10178	9.10827e-05	21502	0.000173468	6107	6.32465e-05
Serine	Amino acids	-	-	-	-	-	-	-	-	-	-	-	-	-	-	-	-	-	-	4101	0.00038058	4124	0.00027791	4018	0.000295997	2019	2.51803e-05	2183	1.90656e-05	1977	4.21389e-05	3941	3.52679e-05	4015	3.23911e-05	3804	3.93957e-05
Shikimic acid	Organic acids	47564	0.000409047	28560	0.000333319	70880	0.00074084	290611	0.00247635	298441	0.00360352	506308	0.00456688	51417	0.000359581	81899	0.000550276	94613	0.000868542	-	-	-	-	-	-	-	-	-	-	-	-	-	-	-	-	-	-
Stearic acid	Lipids	36082	0.000310302	24674	0.000287966	46958	0.000490806	49176	0.000419038	40207	0.000485479	36529	0.00032949	50764	0.000355015	68053	0.000457245	77439	0.000710885	23354	0.00216729	23925	0.00161227	24070	0.00177318	13606	0.00016969	19897	0.000173774	16635	0.000354568	64422	0.000576511	74940	0.00060458	28445	0.000294588
Succinic acid	Organic acids	2666	2.29274e-05	116	1.35382e-06	836	8.7379e-06	2632	2.24278e-05	6311	7.62021e-05	366	3.30131e-06	4452	3.11348e-05	4489	3.01614e-05	4086	3.75092e-05	95	8.81616e-06	117	7.88445e-06	102	7.51412e-06	207	2.58164e-06	2533	2.21224e-05	5331	0.000113628	3346	2.99433e-05	6908	5.57305e-05	5812	6.01914e-05
Sucrose	Sugars	33819	0.000290841	27754	0.000323912	21731	0.000227133	11368819	0.0968759	18912308	0.228357	10629414	0.0958769	31378	0.00021944	39700	0.000266743	106305	0.000975873	36404	0.00337835	44251	0.002982	55321	0.00407538	80181666	1	114499438	1	33670390	0.717669	363339	0.00325151	244243	0.00197044	96558669	1
Tartaric acid	Organic acids	40507	0.000348357	40992	0.000478411	39891	0.000416942	69981	0.000596321	72001	0.000869376	71068	0.000641031	20301	0.000141974	25442	0.000170944	23204	0.000213011	-	-	-	-	-	-	-	-	-	-	-	-	-	-	-	-	-	-
Terephthalic acid	Organic acids	1602	1.37771e-05	1488	1.73662e-05	1560	1.63052e-05	320	2.72678e-06	362	4.37097e-06	351	3.16601e-06	996	6.96546e-06	781	5.24751e-06	997	9.1524e-06	2184	0.000202679	2301	0.000155061	2231	0.000164353	1004	1.25216e-05	1183	1.03319e-05	1093	2.32968e-05	2982	2.66858e-05	3094	2.49609e-05	3194	3.30783e-05
Tridecanol	Lipids	31012	0.000266701	30346	0.000354163	29914	0.000312662	6546	5.57797e-05	6672	8.0561e-05	6512	5.8738e-05	3521	2.46239e-05	3390	2.27773e-05	3401	3.1221e-05	8556	0.000794012	8221	0.000554	8337	0.000614169	33525	0.000418113	29985	0.000261879	31080	0.000662456	46635	0.000417335	44212	0.000356681	45483	0.00047104
Triethylamine	Amines	4522	3.88889e-05	4598	5.36625e-05	4461	4.66265e-05	9724	8.28601e-05	9931	0.000119912	9880	8.91173e-05	21447	0.000149988	20215	0.000135824	19986	0.00018347	10278	0.000953816	4304	0.00029004	6683	0.000492322	7448	9.28891e-05	7858	6.86292e-05	7606	0.000162118	2532	2.26588e-05	2887	2.32909e-05	3473	3.59678e-05
Valeric acid	Amino acids	1201	1.03285e-05	1240	1.44718e-05	1219	1.2741e-05	501	4.26912e-06	624	7.53449e-06	557	5.02412e-06	1603	1.12105e-05	1742	1.17044e-05	1550	1.42289e-05	3656	0.000339283	3882	0.000261602	3750	0.000276254	1998	2.49184e-05	1763	1.53975e-05	1689	3.60003e-05	7803	6.98289e-05	7634	6.15875e-05	7921	8.2033e-05
Xylitol	Polyols	54887	0.000472024	56631	0.000660931	55376	0.000578792	27731	0.000236301	26932	0.00032519	26533	0.000239327	52819	0.000369386	53112	0.000356857	52781	0.000484526	6582	0.000610821	6882	0.000463767	6421	0.000440239	36912	0.000467376	37475	0.000325198	37235	0.000793647	13485	0.000119719	13378	0.00010725	13294	0.000137678

## Sheet: Table S4
Table S4. List of the differential metabolites identified in Asarum
Type	Metabolites	VIP	p.value	FDR	Tissue
Primary metabolites	DL-Norvaline	1.4082	2.0866e-13	1.6484e-11	Leaves
Primary metabolites	Ribitol	1.2551	3.5706e-11	8.772e-10	Leaves
Primary metabolites	Erythritol	1.5283	4.4415e-11	8.772e-10	Leaves
Primary metabolites	L-Serine	1.0603	2.1933e-10	2.683e-09	Leaves
Primary metabolites	Pipecolic acid	1.3313	4.889e-10	4.8279e-09	Leaves
Primary metabolites	d-Galactose	1.6249	1.2202e-09	1.0711e-08	Leaves
Primary metabolites	Xylitol	1.3362	4.2989e-09	3.0874e-08	Leaves
Primary metabolites	L-Proline	1.3788	5.0742e-09	3.3405e-08	Leaves
Primary metabolites	Propylamine	1.6238	2.0704e-08	1.21e-07	Leaves
Primary metabolites	Triethylamine	1.0685	3.1625e-08	1.6656e-07	Leaves
Primary metabolites	Tartaric acid	1.6084	8.962e-08	4.1672e-07	Leaves
Primary metabolites	Hexadecane	1.5713	2.1176e-07	9.2941e-07	Leaves
Primary metabolites	3-Aminoisobutyric acid	1.0326	3.1318e-07	1.3022e-06	Leaves
Primary metabolites	Carbamic acid	1.5605	3.4404e-07	1.3589e-06	Leaves
Primary metabolites	Butane	1.4382	7.9685e-07	2.8614e-06	Leaves
Primary metabolites	l-Isoleucine	1.3341	1.2849e-06	4.4132e-06	Leaves
Primary metabolites	2-Butenoic acid	1.3956	3.3738e-06	1.1105e-05	Leaves
Primary metabolites	Valeric acid	1.6046	3.9021e-06	1.2331e-05	Leaves
Primary metabolites	Myo-Inositol	1.5966	6.0589e-05	0.00014958	Leaves
Primary metabolites	Galactinol	1.0093	0.00011044	0.00026439	Leaves
Primary metabolites	Maltose	1.5567	0.00059717	0.0013875	Leaves
Primary metabolites	Sucrose	1.3375	0.0010643	0.0022724	Leaves
Primary metabolites	Propanoic acid	1.3852	0.0015434	0.0031264	Leaves
Primary metabolites	Shikimic acid	1.2431	0.0031922	0.0060045	Leaves
Primary metabolites	3-Chloro-1,2-propanediol	1.5006	0.0033241	0.0061071	Leaves
Primary metabolites	Palmitic Acid	1.4254	0.0047778	0.0085783	Leaves
Primary metabolites	Phthalic acid	1.1376	0.015926	0.026183	Leaves
Primary metabolites	Propylene glycol	1.3898	0.01681	0.026559	Leaves
Primary metabolites	Galactaric acid	1.0919	0.017678	0.027384	Leaves
Primary metabolites	Propanedioic acid	1.2947	0.030509	0.044634	Leaves
Primary metabolites	Stearic acid	1.009	0.034063	0.048926	Leaves
Phenolic metabolites	Taxifolin	1.0574	9.7863e-06	7.8007e-05	Leaves
Phenolic metabolites	Isoquercitrin	1.1422	1.0065e-05	7.8007e-05	Leaves
Phenolic metabolites	Protocatechuic acid	1.3564	1.6611e-05	0.00010299	Leaves
Phenolic metabolites	Naringenin	1.4594	2.3921e-05	0.00012359	Leaves
Phenolic metabolites	Kaempferol	1.5007	5.4198e-05	0.00024002	Leaves
Phenolic metabolites	Genistein	1.4542	8.9801e-05	0.0003477	Leaves
Phenolic metabolites	Rosmarinic acid	1.2507	0.00014207	0.00044041	Leaves
Phenolic metabolites	Galangin	1.4887	0.00017957	0.00050606	Leaves
Phenolic metabolites	Genistin	1.46	0.00024909	0.00064348	Leaves
Phenolic metabolites	Chrysin	1.4018	0.00072067	0.0014894	Leaves
Phenolic metabolites	Benzoic acid	1.4036	0.0019523	0.00356	Leaves
Phenolic metabolites	P-hydroxycinnamic acid	1.4009	0.0030679	0.0045288	Leaves
Phenolic metabolites	Quercitrin	1.2813	0.0065176	0.0090605	Leaves
Phenolic metabolites	Apigenin	1.3799	0.0067223	0.0090605	Leaves
Phenolic metabolites	Daidzein	1.2042	0.032581	0.038846	Leaves
Primary metabolites	1-Butanol	1.3727	9.4203e-06	2.713e-05	Roots
Primary metabolites	2-Butenedioic acid	1.3743	2.883e-09	2.9654e-08	Roots
Primary metabolites	4-Aminobutanoic acid	1.202	0.024584	0.03848	Roots
Primary metabolites	Acetamide	1.4702	2.2816e-06	8.2137e-06	Roots
Primary metabolites	Benzenamine	1.522	1.3073e-05	3.6203e-05	Roots
Primary metabolites	Cysteine	1.0792	9.6332e-07	3.6505e-06	Roots
Primary metabolites	D-Fructose	1.1555	0.00062616	0.0012881	Roots
Primary metabolites	d-Glucose	1.136	0.0002433	0.00056509	Roots
Primary metabolites	Dopamine	1.3085	0.011182	0.01917	Roots
Primary metabolites	D-Phenylalanine	1.5304	2.04e-07	9.1798e-07	Roots
Primary metabolites	Ethanolamine	1.371	1.6647e-05	4.4391e-05	Roots
Primary metabolites	Fumaric acid	1.2778	3.5878e-06	1.1232e-05	Roots
Primary metabolites	Galactopyranose	1.3318	9.2187e-09	6.5704e-08	Roots
Primary metabolites	Glyceric acid	1.1256	0.0063803	0.011484	Roots
Primary metabolites	Glycine	1.1348	4.1269e-08	2.2857e-07	Roots
Primary metabolites	Hexanoic acid	1.4996	0.00016307	0.00039137	Roots
Primary metabolites	L-Isoleucine	1.0539	0.012154	0.02035	Roots
Primary metabolites	L-Rhamnose	1.3461	6.8682e-09	6.1814e-08	Roots
Primary metabolites	L-Threonine	1.1524	0.00034565	0.00075414	Roots
Primary metabolites	L-Valine	1.0998	0.001778	0.0033689	Roots
Primary metabolites	Myo-Inositol	1.1049	0.00084904	0.0016981	Roots
Primary metabolites	Oxalic acid	1.313	8.0515e-11	1.9324e-09	Roots
Primary metabolites	Penicillamine	1.2628	7.787e-10	1.1213e-08	Roots
Primary metabolites	Pentanoic acid	1.3534	2.7795e-06	9.5296e-06	Roots
Primary metabolites	Propanedioic acid	1.4288	0.0012125	0.0023594	Roots
Primary metabolites	Propanoic acid	1.3457	0.00050656	0.0010727	Roots
Primary metabolites	Propylene glycol	1.3686	0.0020767	0.0038339	Roots
Primary metabolites	Serine	1.2727	3.3271e-07	1.4091e-06	Roots
Primary metabolites	Stearic acid	1.1971	0.031424	0.04814	Roots
Primary metabolites	Terephthalic acid	1.5312	4.2005e-07	1.6802e-06	Roots
Primary metabolites	Triethylamine	1.1615	0.03351	0.049975	Roots
Primary metabolites	Valeric acid	1.5107	9.8504e-09	6.5704e-08	Roots
Primary metabolites	Xylitol	1.1437	6.3962e-12	4.6052e-10	Roots
Phenolic metabolites	Caffeic acid	1.2919	0.0023637	0.0089107	Roots
Phenolic metabolites	Isoliquiritigenin	1.3946	0.016665	0.025574	Roots
Phenolic metabolites	Isoquercitrin	1.3867	0.0010272	0.0045489	Roots
Phenolic metabolites	Liquiritigenin	1.2703	0.0094474	0.017044	Roots
Phenolic metabolites	Luteolin	1.2374	1.4914e-06	2.3117e-05	Roots
Phenolic metabolites	Naringenin	1.4342	0.011831	0.019303	Roots
Phenolic metabolites	Naringin	1.0652	0.033844	0.045616	Roots
Phenolic metabolites	Protocatechuic acid	1.4742	0.00959	0.017044	Roots
Phenolic metabolites	Rosmarinic acid	1.5393	0.002587	0.0089107	Roots
Phenolic metabolites	Rutin	1.5048	0.0060024	0.016135	Roots
Phenolic metabolites	Sinapic Acid	1.3144	0.0069217	0.016135	Roots
Phenolic metabolites	Taxifolin	1.4919	0.00058374	0.0036192	Roots

## Sheet: Table S5
Table S5. Enriched metabolic pathways of the differential metabolites at different altitudes
Pathway name	ListHit	impact	-log p	Tissue
Flavone and flavonol biosynthesis	4	0.5	5.14167	Leaves
Galactose metabolism	4	0.19227	3.29199	Leaves
Glycine, serine and threonine metabolism	1	0.18128	0.405994	Leaves
Flavonoid biosynthesis	5	0.14763	3.34401	Leaves
Aminoacyl-tRNA biosynthesis	3	0.11111	1.54572	Leaves
Biosynthesis of secondary metabolites - unclassified	1	1	1.14206	Leaves
Inositol phosphate metabolism	1	0.10251	0.462798	Leaves
Starch and sucrose metabolism	1	0.0889	0.549874	Leaves
Phenylalanine, tyrosine and tryptophan biosynthesis	1	0.08008	0.549874	Leaves
Arginine and proline metabolism	1	0.06623	0.395914	Leaves
Nitrogen metabolism	1	0.05882	0.783175	Leaves
Phosphatidylinositol signaling system	1	0.03285	0.48912	Leaves
Glyoxylate and dicarboxylate metabolism	1	0.01798	0.450482	Leaves
Phenylpropanoid biosynthesis	1	0.01135	0.298829	Leaves
Fatty acid biosynthesis	2	0.01123	0.697929	Leaves
Ubiquinone and other terpenoid-quinone biosynthesis	1	0.00097	0.359111	Leaves
Biosynthesis of unsaturated fatty acids	2	0	1.39179	Leaves
Sulfur metabolism	1	0	0.695316	Leaves
Pentose and glucuronate interconversions	1	0	0.670277	Leaves
Sphingolipid metabolism	1	0	0.64695	Leaves
Ascorbate and aldarate metabolism	1	0	0.625123	Leaves
Cutin, suberine and wax biosynthesis	1	0	0.625123	Leaves
Lysine degradation	1	0	0.625123	Leaves
Propanoate metabolism	1	0	0.585327	Leaves
Valine, leucine and isoleucine biosynthesis	1	0	0.549874	Leaves
Fatty acid elongation	1	0	0.533518	Leaves
Cyanoamino acid metabolism	1	0	0.450482	Leaves
Fatty acid degradation	1	0	0.367826	Leaves
Valine, leucine and isoleucine degradation	1	0	0.367826	Leaves
Cysteine and methionine metabolism	1	0	0.298829	Leaves
Glucosinolate biosynthesis	1	0	0.200915	Leaves
Isoquinoline alkaloid biosynthesis	1	0.5	1.02962	Roots
Glycine, serine and threonine metabolism	3	0.3547	1.83027	Roots
Flavonoid biosynthesis	4	0.2107	2.22839	Roots
Ascorbate and aldarate metabolism	2	0.1791	1.48411	Roots
Glyoxylate and dicarboxylate metabolism	3	0.14641	1.9859	Roots
Butanoate metabolism	1	0.13636	0.613715	Roots
Alanine, aspartate and glutamate metabolism	2	0.1331	1.32225	Roots
Tyrosine metabolism	2	0.11487	1.58109	Roots
Inositol phosphate metabolism	1	0.10251	0.432503	Roots
Glutathione metabolism	2	0.07869	1.19097	Roots
Sulfur metabolism	1	0.06077	0.661524	Roots
Cysteine and methionine metabolism	1	0.04897	0.272963	Roots
Phenylpropanoid biosynthesis	1	0.0416	0.272963	Roots
Phosphatidylinositol signaling system	1	0.03285	0.458296	Roots
Citrate cycle (TCA cycle)	1	0.0295	0.552904	Roots
Glycerophospholipid metabolism	1	0.00947	0.339799	Roots
Glycerolipid metabolism	1	0.00426	0.534959	Roots
Glycolysis / Gluconeogenesis	1	0.00038	0.458296	Roots
Aminoacyl-tRNA biosynthesis	5	0	3.20098	Roots
Valine, leucine and isoleucine biosynthesis	3	0	2.32879	Roots
Flavone and flavonol biosynthesis	2	0	1.98134	Roots
Thiamine metabolism	2	0	1.32225	Roots
Betalain biosynthesis	1	0	1.32057	Roots
Pantothenate and CoA biosynthesis	2	0	1.28699	Roots
Cyanoamino acid metabolism	2	0	1.10703	Roots
Valine, leucine and isoleucine degradation	2	0	0.925805	Roots
Pentose and glucuronate interconversions	1	0	0.636783	Roots
Arginine biosynthesis	1	0	0.592167	Roots
Propanoate metabolism	1	0	0.552904	Roots
Glucosinolate biosynthesis	2	0	0.547095	Roots
Pyruvate metabolism	1	0	0.517999	Roots
Biosynthesis of unsaturated fatty acids	1	0	0.517999	Roots
Galactose metabolism	1	0	0.445111	Roots
Arginine and proline metabolism	1	0	0.367148	Roots
Amino sugar and nucleotide sugar metabolism	1	0	0.24886	Roots
Fatty acid biosynthesis	1	0	0.217585	Roots

## Sheet: TableS6
Table S6. Statistics for two-way ANOVA, incorporating tissues, altitudes, and their interaction as fixed effects
	type	tissues		Altitude		altitudes-tissues interactions
		F	Sig.	F	Sig.	F	Sig.
Succinic acid	primary metabolite	1.412	0.258	10.1	0.003	1.265	0.317
Oxalic acid	primary metabolite	100.259	0	224.494	0	184.107	0
Acetamide	primary metabolite	315.831	0	288.845	0	541.124	0
Phthalic acid	primary metabolite	0.882	0.366	92.365	0	20.975	0
2-Butenoic acid	primary metabolite	2671.1	0	6034.96	0	4623.02	0
Pentanoic acid	primary metabolite	16.364	0.002	33.493	0	34.788	0
L-Valine	primary metabolite	3.238	0.097	1.133	0.354	5.137	0.024
Butanoic acid	primary metabolite	6.101	0.029	6.15	0.014	5.1	0.025
Terephthalic acid	primary metabolite	16.045	0.002	241.968	0	541.617	0
1-Butanol	primary metabolite	417.329	0	472.003	0	69.976	0
L-Isoleucine	primary metabolite	2.52	0.138	180.224	0	90.989	0
Benzamide	primary metabolite	1.07	0.321	28.377	0	10.705	0.002
Dopamine	primary metabolite	1.958	0.187	9.331	0.004	6.733	0.011
2-Butenedioic acid	primary metabolite	0.623	0.445	76.196	0	178.19	0
Valeric acid	primary metabolite	276.89	0	889.622	0	485.01	0
Sedoheptulose	primary metabolite	4.192	0.063	13.685	0.001	1.793	0.208
Glycerol	primary metabolite	0.856	0.373	0.834	0.458	1.165	0.345
Propanoic acid	primary metabolite	21.301	0.001	1.285	0.312	1.227	0.328
Glycine	primary metabolite	97.436	0	295.11	0	564.349	0
Xylitol	primary metabolite	20658.3	0	2456.11	0	2155.52	0
Dodecane	primary metabolite	5.429	0.038	1.626	0.237	5.577	0.019
Acetic acid	primary metabolite	2.073	0.175	38.989	0	8.341	0.005
Decane	primary metabolite	0.681	0.425	5.682	0.018	1.92	0.189
2-Propenoic acid	primary metabolite	7.788	0.016	2.943	0.091	0.713	0.51
Tridecanol	primary metabolite	42.824	0	6475.74	0	2755.34	0
Triethylamine	primary metabolite	23.483	0	34.52	0	45.929	0
3-Chloro-1,2-propanediol	primary metabolite	0.082	0.779	6.339	0.013	2.581	0.117
Octane	primary metabolite	15.106	0.002	4.712	0.031	3.575	0.061
Glyceric acid	primary metabolite	3.784	0.076	14.703	0.001	10.23	0.003
Galactaric acid	primary metabolite	16.963	0.001	27.688	0	51.202	0
Pipecolic acid	primary metabolite	52.274	0	85.458	0	86.875	0
Propanedioic acid	primary metabolite	0.965	0.345	44.108	0	26.204	0
Lactose	primary metabolite	10.786	0.007	36.439	0	1.055	0.378
Butanedioic acid	primary metabolite	0.533	0.479	4.346	0.038	4.715	0.031
Stearic acid	primary metabolite	0.655	0.434	1.95	0.185	21.351	0
L-Rhamnose	primary metabolite	5.391	0.039	18.245	0	40.232	0
Ethanolamine	primary metabolite	53.103	0	55.763	0	29.06	0
Sucrose	primary metabolite	1.599	0.23	22.447	0	17.818	0
Lactic Acid	primary metabolite	1.453	0.251	25.135	0	9.641	0.003
Arabinofuranose	primary metabolite	0.072	0.792	2.729	0.105	2.21	0.152
Propylene glycol	primary metabolite	4.022	0.068	7.089	0.009	10.706	0.002
Palmitic Acid	primary metabolite	1.528	0.24	0.593	0.568	6.264	0.014
Ribitol	primary metabolite	7161.85	0	12727	0	806.845	0
Aconitic acid	primary metabolite	0.31	0.588	1.644	0.234	22.269	0
Malic acid	primary metabolite	7.086	0.021	8.265	0.006	33.969	0
d-Galactose	primary metabolite	7038.49	0	10893.2	0	14061.6	0
4-Aminobutanoic acid	primary metabolite	6.456	0.026	4.7	0.031	35.345	0
Maltose	primary metabolite	21.643	0.001	13.169	0.001	20.086	0
Myo-Inositol	primary metabolite	6.437	0.026	13.169	0.001	0.022	0.978
Citric acid	primary metabolite	4.685	0.051	5.055	0.026	10.474	0.002
Ribonic acid	primary metabolite	43.48	0	39.033	0	6.614	0.012
d-Mannose	primary metabolite	0.175	0.683	1.13	0.355	0.058	0.944
D-Gluconic acid	primary metabolite	12.479	0.004	36.994	0	5.789	0.017
D-Fructose	primary metabolite	11.411	0.005	30.055	0	101.565	0
d-Glucose	primary metabolite	0.933	0.353	10.027	0.003	21.418	0
P-hydroxycinnamic acid	Phenolic metabolites	2.88	0.115	8.345	0.005	0.128	0.881
Benzoic acid	Phenolic metabolites	23.618	0	3.547	0.062	11.964	0.001
Genistein	Phenolic metabolites	9.952	0.008	39.513	0	14.032	0.001
Apigenin	Phenolic metabolites	0.674	0.428	28.738	0	3.574	0.061
Syringic acid	Phenolic metabolites	61.941	0	101.232	0	162.357	0
Naringenin	Phenolic metabolites	146.047	0	53.766	0	24.77	0
Quercitrin	Phenolic metabolites	1.115	0.312	101.141	0	7.15	0.009
Luteolin	Phenolic metabolites	3.999	0.069	63.91	0	21.199	0
Cinnamic acid	Phenolic metabolites	1.041	0.328	2.789	0.101	36.15	0
Caffeic acid	Phenolic metabolites	4.183	0.063	19.9	0	49.099	0
Naringin	Phenolic metabolites	0.273	0.611	3.863	0.051	4.149	0.043
Kaempferol	Phenolic metabolites	23.486	0	62.985	0	7.741	0.007
Liquiritigenin	Phenolic metabolites	1.394	0.261	0.077	0.927	4.351	0.038
Galangin	Phenolic metabolites	6.725	0.024	31.857	0	9.211	0.004
Protocatechuic acid	Phenolic metabolites	76.005	0	339.261	0	109.835	0
Rutin	Phenolic metabolites	47.954	0	4.791	0.03	58.338	0
Vanillic acid	Phenolic metabolites	22.611	0	98.362	0	59.146	0
Astragalin	Phenolic metabolites	147.919	0	21.115	0	330.867	0
Taxifolin	Phenolic metabolites	14.832	0.002	45.255	0	62.595	0
Rosmarinic acid	Phenolic metabolites	69.73	0	42.794	0	52.444	0
Isoquercitrin	Phenolic metabolites	86.036	0	265.134	0	76.085	0
Sinapic Acid	Phenolic metabolites	11.439	0.005	55.366	0	15.305	0
Chrysin	Phenolic metabolites	14.693	0.002	24.766	0	0.544	0.594
Genistin	Phenolic metabolites	146.895	0	1.32	0.303	27.822	0
Isoliquiritigenin	Phenolic metabolites	1.24	0.287	0.069	0.933	1.928	0.188
L-phenylalanine	Phenolic metabolites	4.455	0.056	6.198	0.014	5.93	0.016
Hesperetin	Phenolic metabolites	41.391	0	61.456	0	6.135	0.015
Ferulic acid	Phenolic metabolites	6.883	0.022	9.927	0.003	19.878	0
Chlorogenic acid	Phenolic metabolites	78.214	0	54.794	0	24.761	0
Daidzein	Phenolic metabolites	5.286	0.04	3.976	0.047	13.053	0.001
TP	Elements	0.161	0.695	3.518	0.063	113.042	0
TN	Elements	40.456	0	127.519	0	95.452	0
TOC	Elements	0.034	0.857	4.483	0.035	22.743	0
Al	Elements	9.891	0.008	736.489	0	65.628	0
Cu	Elements	62.482	0	418.173	0	43.623	0
Fe	Elements	0.71	0.416	85.929	0	18.033	0
Mn	Elements	3.117	0.103	77.038	0	92.91	0
Mo	Elements	187.967	0	222.086	0	291.707	0
Zn	Elements	0.414	0.532	150.989	0	138.828	0
B	Elements	258.209	0	593.423	0	1145.93	0
Mg	Elements	12.67	0.004	511.909	0	767.523	0
asaimin	Medicinal Ingredients	76.474	0	263.197	0	114.512	0
sesamin	Medicinal Ingredients	47.691	0	419.537	0	93.675	0
